# Supplementary material for: Adoptive transfer of zoledronate-expanded autologous Vγ9Vδ2 T-cells in patients with treatment-refractory non-small-cell lung cancer: a multicenter, open-label, single-arm, phase 2 study
Source: PubMed Central journal article supplement — J Immunother Cancer. 2020 Sep 18;8(2):e001185. doi: 10.1136/jitc-2020-001185 (PMC7511646; doi:10.1136/jitc-2020-001185), 2020-09-18
Supplement: jitc-2020-001185supp004.pdf [file jitc-2020-001185supp004.pdf]

A. Stimulated V $\gamma$ 9V $\delta$ 2 T cells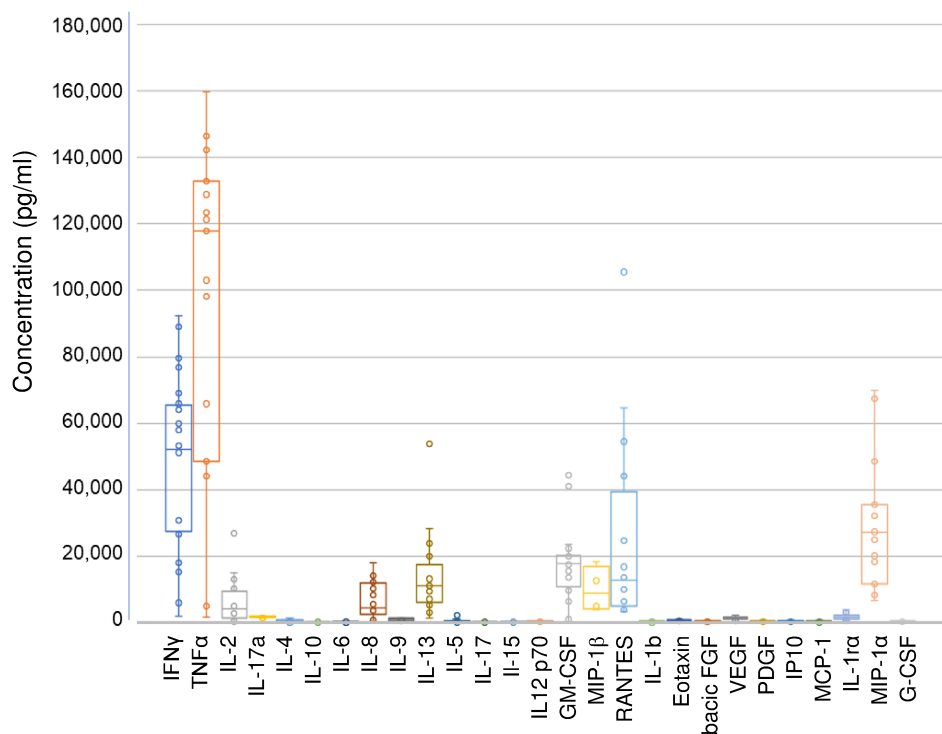B. Unstimulated V $\gamma$ 9V $\delta$ 2 T cells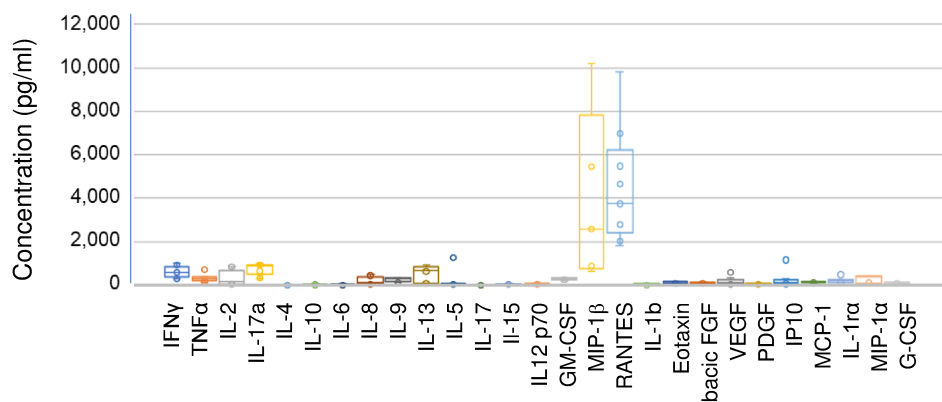

**Supplementary Figure S2. Production of cytokines and chemokines by zoledronate expanded V $\gamma$ 9V $\delta$ 2 T-cells.** Cultured V $\gamma$ 9V $\delta$ 2 T-cells ( $2 \times 10^5$ ) were stimulated with the same number of Daudi cells for 4 h (A) or left unstimulated (B). The culture supernatants were harvested and analyzed for cytokine and chemokine production using Bio-Plex Pro Human Cytokine Grp I panel 27-plex (BIO-RAD, Hercules, CA). The concentration of FGF basic, Eotaxin, G-CSF, GM-CSF, IFN- $\gamma$ , IL-1 $\beta$ , IL-1ra, IL-2, IL-4, IL-5, IL-6, IL-7, IL-8, IL-9, IL-10, IL-12 (p70), IL-13, IL-15, IL-17, IP-10, MCP-1, MIP-1 $\alpha$ , MIP-1 $\beta$ , PDGF-BB, RANTES, TNF- $\alpha$ , and VEGF were measured. Each dot indicates each patient sample.
