# Supplementary material for: Adoptive transfer of zoledronate-expanded autologous Vγ9Vδ2 T-cells in patients with treatment-refractory non-small-cell lung cancer: a multicenter, open-label, single-arm, phase 2 study
Source: PubMed Central journal article supplement — J Immunother Cancer. 2020 Sep 18;8(2):e001185. doi: 10.1136/jitc-2020-001185 (PMC7511646; doi:10.1136/jitc-2020-001185), 2020-09-18
Supplement: jitc-2020-001185supp005.pdf [file jitc-2020-001185supp005.pdf]

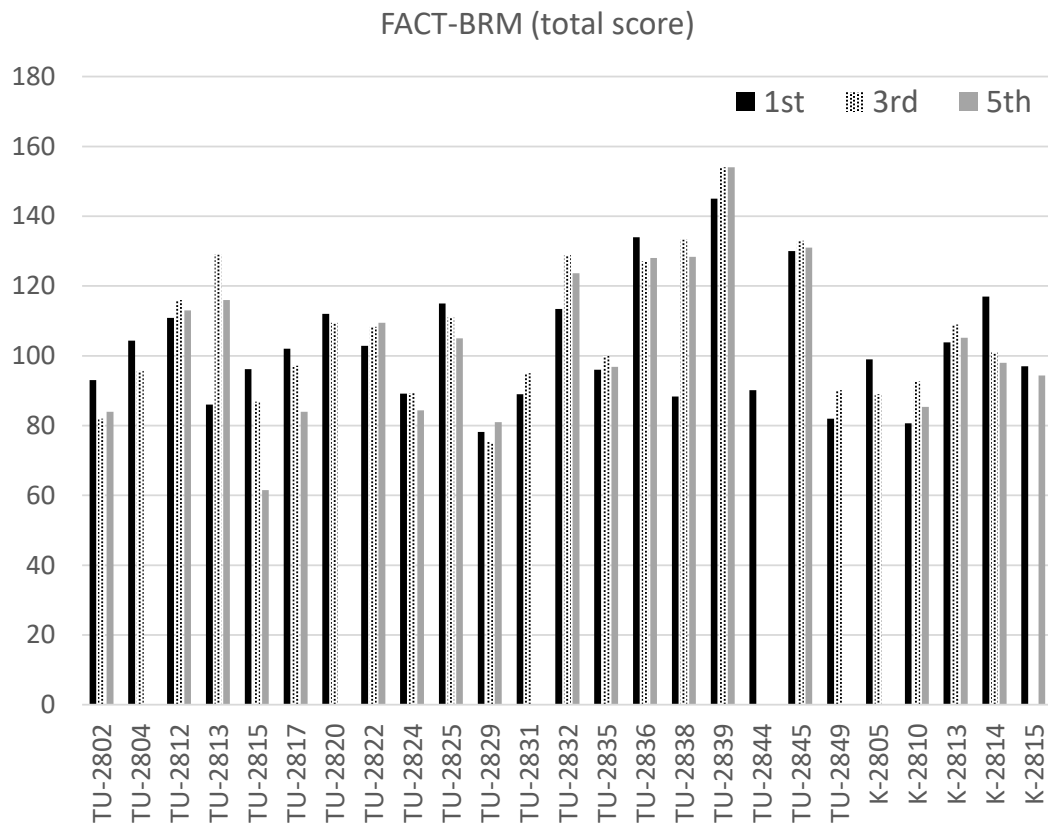

**Supplementary Figure S3. Chronological change of FACT-BRM total score in each patient.** FACT-BRM total scores of each patient were displayed at three-time points (at the time of first V $\gamma$ 9V $\delta$ 2 T cell injection; black bar, third injection; dotted bar, and fifth injection; gray bar).
