# Supplementary material for: Adoptive transfer of zoledronate-expanded autologous Vγ9Vδ2 T-cells in patients with treatment-refractory non-small-cell lung cancer: a multicenter, open-label, single-arm, phase 2 study
Source: PubMed Central journal article supplement — J Immunother Cancer. 2020 Sep 18;8(2):e001185. doi: 10.1136/jitc-2020-001185 (PMC7511646; doi:10.1136/jitc-2020-001185), 2020-09-18

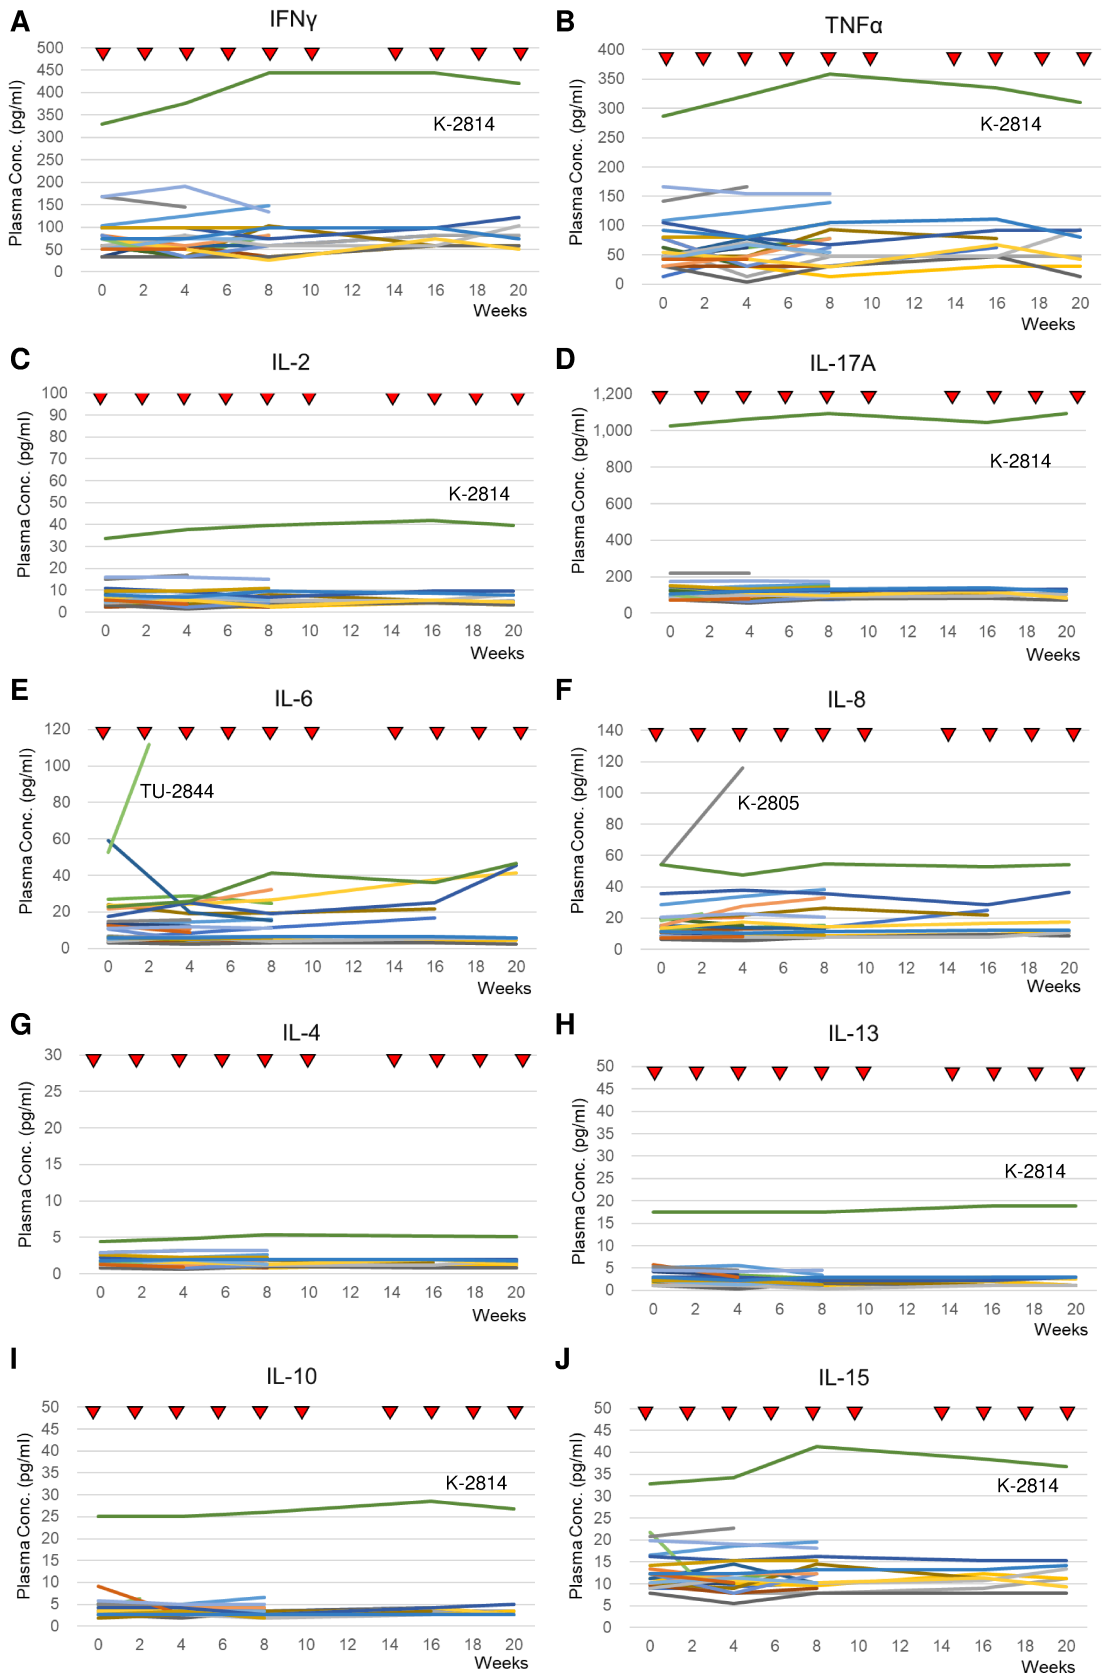

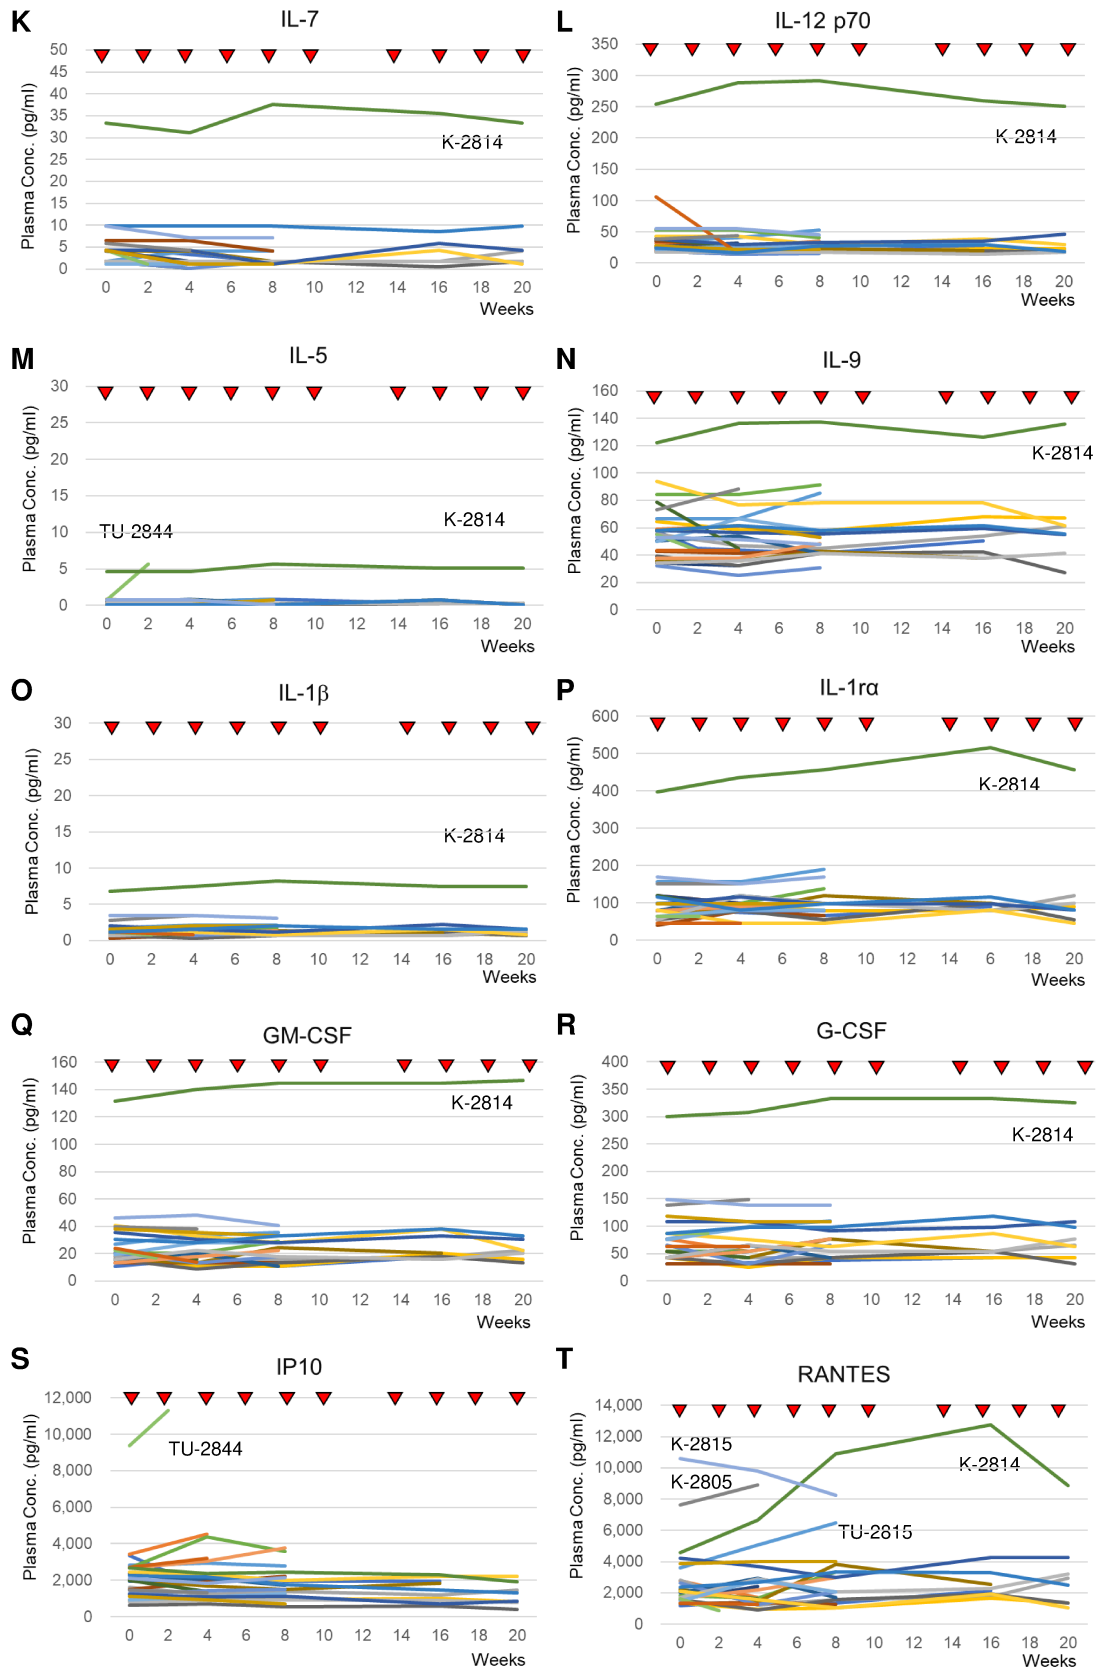

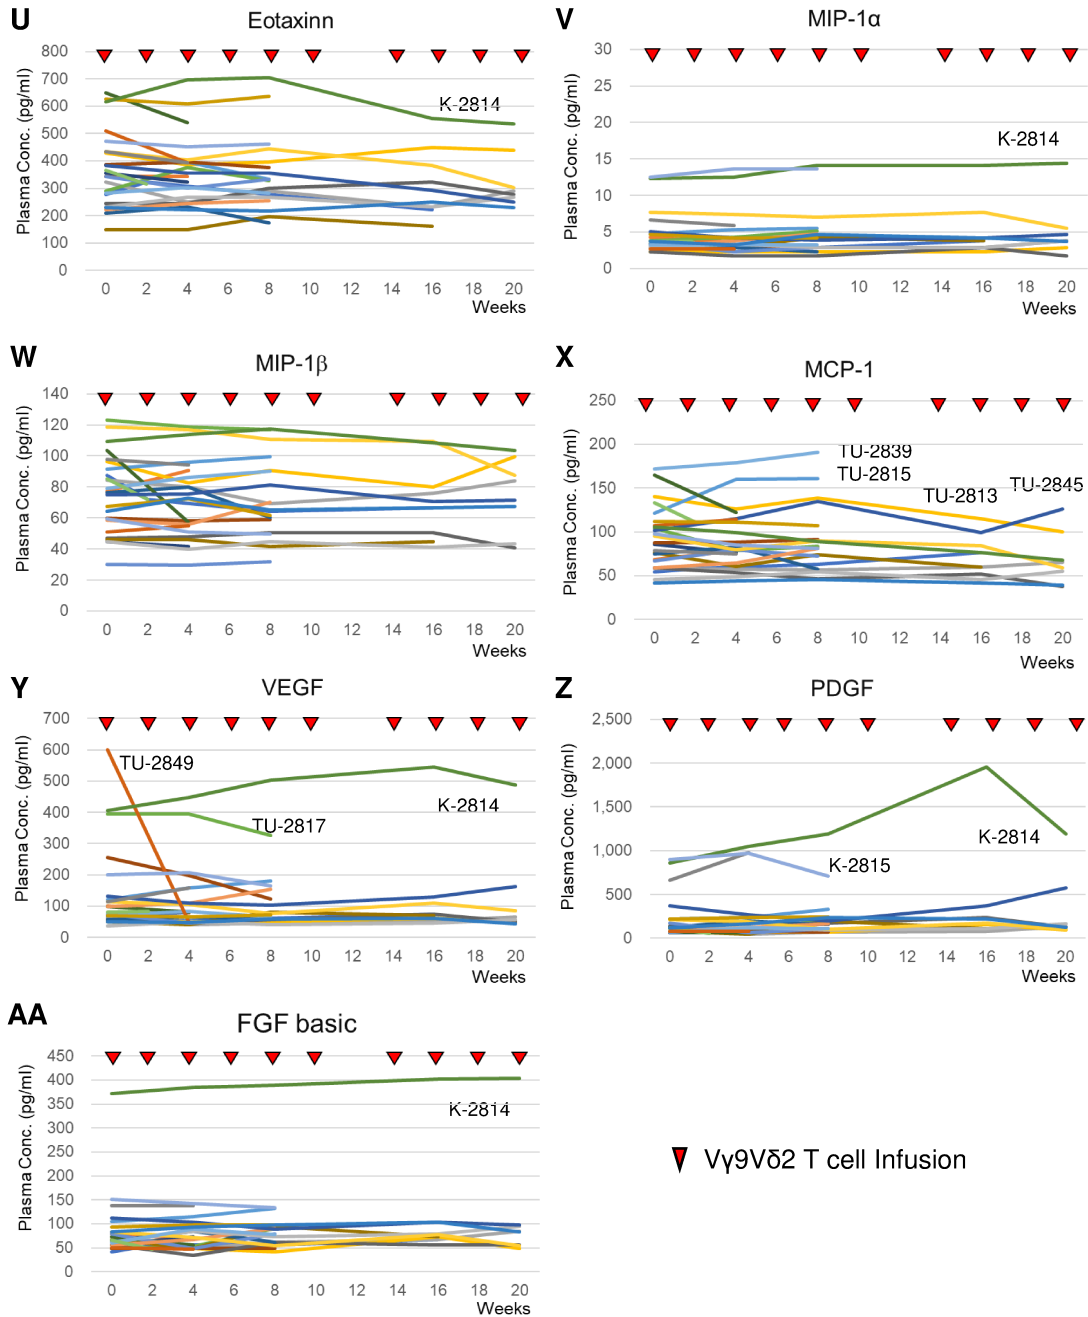

**Supplementary Figure S5. Serum cytokine and chemokine profiles.**

Blood was drawn at each patient visit just before V $\gamma$ 9V $\delta$ 2 T-cell injection. The serum was isolated and cryopreserved until use. Serum cytokine and chemokine profiles were monitored during treatment. (A) IFN- $\gamma$ , (B) TNF- $\alpha$ , (C) IL-2, (D) IL-17A, (E) IL-6, (F) IL-8, (G) IL-4, (H) IL-13, (I) IL-10, (J) IL-15, (K) IL-7, (L) IL-12 (p70), (M) IL-5, (N) IL-9, (O) IL-1 $\beta$ , (P) IL-1ra, (Q) GM-CSF, (R) G-CSF, (S) IP-10, (T) RANTES, (U) Eotaxin, (V) MIP-1 $\alpha$ , (W) MIP-1 $\beta$ , (X) MCP-1, (Y) VEGF, (Z) PDGF-BB, (AA) FGF basic. Each color-coded line indicates one patient.

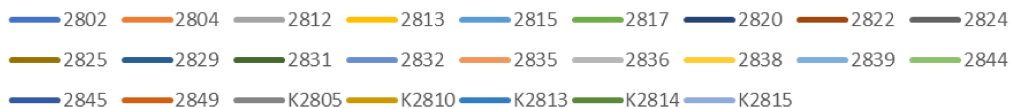

Supplement: jitc-2020-001185supp007.pdf [file jitc-2020-001185supp007.pdf]
